# Supplementary material for: Role of QRS Fragmentation for Risk Stratification in Adults With Tetralogy of Fallot
Source: PubMed Central journal article supplement — J Am Heart Assoc. 2018 Dec 13;7(24):e010274. doi: 10.1161/JAHA.118.010274 (PMC6405623; doi:10.1161/jaha.118.010274), 2018-12-13
Supplement: JAH3-7-e010274-s001.pdf [file JAH3-7-e010274-s001.pdf]

**Supplementary Table 1: Inter-observer correlation for diagnosis of QRS-f**

|                  | Observer #1 | Observer #2 | ICC (95% CI)            |
|------------------|-------------|-------------|-------------------------|
| No QRS-f         | 304         | 307         | 0.82 (0.89-0.88)        |
| Mild QRS-f       | 43          | 58          | 0.70 (0.54-0.86)        |
| Moderate QRS-f   | 77          | 71          | 0.80 (0.69-0.89)        |
| Severe QRS-f     | 41          | 39          | 0.94 (0.92-0.96)        |
| <b>All QRS-f</b> | <b>161</b>  | <b>168</b>  | <b>0.81 (0.68-0.90)</b> |

QRS-f: QRS fragmentation; ICC: interclass correlation coefficient; CI: confidence interval

Note: the numbers in the different cells represent the count of patients for each severity of QRS-f by each of the observers

**Supplementary Table 2: Incrementally Adjusted Risk for All-cause Mortality for patients with Cardiac MRI (N=157)**

|         | HR (95% CI)        | p      |
|---------|--------------------|--------|
| Model 1 | 2.81 (2.16- 3.66)  | <0.001 |
| Model 2 | 2.61 (2.00 - 3.61) | <0.001 |
| Model 3 | 1.96 (1.22 - 2.85) | 0.022  |
| Model 4 | 1.71 (1.14 – 2.99) | 0.033  |
| Model 5 | 1.63 (1.06-2.61)   | 0.048  |

Model 1: unadjusted all-cause mortality risk based on the extent of QRS-f

Model 2: includes all variables in Model 1 plus adjustment for the following ECG parameters: QRS duration, JT interval and rhythm (sinus, paced rhythm, atrial fibrillation, and atrial flutter/tachycardia).

Model 3: includes all variables in Model 2 plus adjustment for patient demographic characteristics (current age, gender, age at the time of TOF repair and type of TOF repair [transannular patch vs non-transannular patch])

Model 4: includes all variables in Model 3 plus adjustment for history of sustained ventricular tachycardia and/or defibrillator implantation, moderate right ventricular dysfunction by qualitative assessment, and left ventricular ejection fraction <40%.

Model 5: includes all variables in Model 4 plus adjustment for right ventricular end-diastolic volume index > 150 ml/m<sup>2</sup>, right ventricular ejection fraction <40%, and left ventricular ejection fraction <40%.

HR: Hazard ratio; CI: Confidence interval. HR is expressed per incremental risk per class/extent of QRS-f (none, mild, moderate, severe)

**Supplementary Table 3: Incrementally Adjusted Risk for All-cause Mortality for patients with Cardiac catheterization data (N=148)**

|         | HR (95% CI)        | p      |
|---------|--------------------|--------|
| Model 1 | 2.06 (2.23- 3.69)  | <0.001 |
| Model 2 | 2.43 (1.91 - 3.13) | <0.001 |
| Model 3 | 2.06 (1.17 – 3.06) | 0.037  |
| Model 4 | 1.87 (1.05 – 2.61) | 0.046  |
| Model 5 | 1.72 (0.98-2.81)   | 0.055  |

Model 1: unadjusted all-cause mortality risk based on the extent of QRS-f

Model 2: includes all variables in Model 1 plus adjustment for the following ECG parameters: QRS duration, JT interval and rhythm (sinus, paced rhythm, atrial fibrillation, and atrial flutter/tachycardia).

Model 3: includes all variables in Model 2 plus adjustment for patient demographic characteristics (current age, gender, age at the time of TOF repair and type of TOF repair [transannular patch vs non-transannular patch])

Model 4: includes all variables in Model 3 plus adjustment for history of sustained ventricular tachycardia and/or defibrillator implantation, moderate right ventricular dysfunction by qualitative assessment, and left ventricular ejection fraction <40%.

Model 5: includes all variables in Model 4 plus adjustment for right ventricular end-diastolic pressure >14 mm Hg and left ventricular end-diastolic pressure >16 mm Hg

HR: Hazard ratio; CI: Confidence interval. HR is expressed per incremental risk per class/extent of QRS-f (none, mild, moderate, severe)
